# Supplementary material for: Structure of endothelin ETB receptor–Gi complex in a conformation stabilized by unique NPxxL motif
Source: PubMed Central journal article supplement (PMC11484851; doi:10.1038/s42003-024-06905-z), 2024-10-16

## SUPPLEMENTARY INFORMATION

### **Structure of endothelin ET<sub>B</sub> receptor-Gi complex in a conformation stabilized by the unique NPxxL motif**

Kazutoshi Tani, Saori Maki-Yonekura, Ryo Kanno, Tatsuki Negami,  
Tasuku Hamaguchi, Malgorzata Hall, Akira Mizoguchi, Bruno M.  
Humbel, Tohru Terada, Koji Yonekura, Tomoko Doi

Corresponding authors: K. Tani and T. Doi

E-mail: ktani@ccs.tsukuba.ac.jp; doi.tomoko.8n@kyoto-u.jp

#### **This file contains:**

- (1) Supplementary Tables 1 to 6
- (2) Supplementary Figures 1 to 13
- (3) Supplementary References
- (4) Supplementary Figure 14 (The uncropped gel images)

**Supplementary Table 1: ET-1-mediated activation of WT and mutant ET<sub>B</sub> receptors in the G<sub>i</sub> dissociation assay.** Data were collected through the G<sub>i</sub> dissociation assay in parallel. pEC<sub>50</sub> and E<sub>max</sub> estimates represent average value and standard error of the mean (SEM), respectively, from three to five independent experiments performed in duplicate or triplicate. “N.D.” denotes cases where no activity was detected. <sup>a), b), and c)</sup>; Statistical differences from wild type (100%), wild type (50%), and wild type (35%) were analyzed using ANOVA with Dunnet’s multiple comparison of means test, respectively. Significance levels are indicated as (\*\*\*\**p* < 0.0001, \*\*\**p* < 0.001, \*\**p* < 0.01, \**p* < 0.05 vs. WT).

(a) Related to Fig. 2f.

| ET <sub>B</sub> R constructs | pEC <sub>50</sub> | E <sub>max</sub>               | E <sub>max</sub> , %WT | n | relative ET <sub>B</sub> R expression | n |
|------------------------------|-------------------|--------------------------------|------------------------|---|---------------------------------------|---|
| WT (100%)                    | 9.66 ± 0.06       | 0.30 ± 0.010                   | 100 ± 3.1              | 4 | 100                                   | 9 |
| D198A (3.49)                 | 9.86 ± 0.04       | 0.30 ± 0.007 <sup>b)</sup>     | 99.7 ± 2.6             | 3 | 53.1 ± 4.8                            | 6 |
| R199A (3.50)                 | N.D.              | N.D.                           | N.D.                   | 3 | 83.2 ± 6.0                            | 7 |
| Y293F (5.58)                 | 9.39 ± 0.18       | 0.05 ± 0.005 <sup>****a)</sup> | 5.5 ± 1.7              | 3 | 75.6 ± 9.3                            | 5 |
| N382A (7.49)                 | 9.53 ± 0.23       | 0.04 ± 0.005 <sup>****b)</sup> | 2.5 ± 1.8              | 3 | 52.9 ± 1.7                            | 5 |

(b) Related to Fig. 2g.

| ET <sub>B</sub> R constructs | pEC <sub>50</sub> | E <sub>max</sub>               | E <sub>max</sub> , %WT | n | relative ET <sub>B</sub> R expression | n |
|------------------------------|-------------------|--------------------------------|------------------------|---|---------------------------------------|---|
| WT (100%)                    | 9.13 ± 0.05       | 0.26 ± 0.007                   | 100.0 ± 3.0            | 4 | 100                                   | 3 |
| L386Y (7.53)                 | 9.70 ± 0.16       | 0.04 ± 0.004 <sup>****c)</sup> | 15.4 ± 1.5             | 4 | 39.8 ± 4.8                            | 3 |
| L386A (7.53)                 | 9.89 ± 0.17       | 0.03 ± 0.003 <sup>****c)</sup> | 11.5 ± 1.2             | 4 | 34.3 ± 6.0                            | 3 |
| L386N (7.53)                 | N.D.              | N.D.                           | N.D.                   | 3 | 29.0 ± 2.3                            | 3 |
| L386V (7.53)                 | 9.15 ± 0.11       | 0.11 ± 0.006 <sup>****b)</sup> | 33.5 ± 2.5             | 3 | 57.5 ± 4.4                            | 3 |
| L386I (7.53)                 | 8.84 ± 0.07       | 0.15 ± 0.005 <sup>****a)</sup> | 49.6 ± 2.1             | 4 | 99.1 ± 4.9                            | 3 |

(c) Related to Fig. 5a.

| ET <sub>B</sub> R constructs | pEC <sub>50</sub> | E <sub>max</sub>               | E <sub>max</sub> , %WT | n | relative ET <sub>B</sub> R expression | n |
|------------------------------|-------------------|--------------------------------|------------------------|---|---------------------------------------|---|
| WT (100%)                    | 9.66 ± 0.06       | 0.30 ± 0.010                   | 100 ± 3.1              | 4 | 100                                   | 9 |
| WT (50%)                     | 9.67 ± 0.08       | 0.24 ± 0.011                   | 76.5 ± 4.0             | 3 | 66.0 ± 29.2                           | 3 |
| WT (35%)                     | 9.70 ± 0.07       | 0.20 ± 0.008                   | 62.9 ± 2.9             | 3 | 38.2 ± 12.4                           | 3 |
| N134A (ICL1)                 | 9.60 ± 0.06       | 0.18 ± 0.005 <sup>*c)</sup>    | 54.6 ± 2.0             | 3 | 35.5 ± 1.5                            | 4 |
| S390A (8.47)                 | 9.43 ± 0.08       | 0.11 ± 0.005 <sup>****c)</sup> | 28.8 ± 1.8             | 3 | 41.5 ± 3.8                            | 4 |

(d) Related to Fig. 5b.

| ET <sub>B</sub> R constructs | pEC <sub>50</sub> | E <sub>max</sub>               | E <sub>max</sub> , %WT | n | relative ET <sub>B</sub> R expression | n  |
|------------------------------|-------------------|--------------------------------|------------------------|---|---------------------------------------|----|
| WT (100%)                    | 9.66 ± 0.05       | 0.29 ± 0.008                   | 100 ± 3.2              | 5 | 100                                   | 11 |
| M296A (5.61)                 | 9.05 ± 0.08       | 0.13 ± 0.005 <sup>****a)</sup> | 36.2 ± 2.0             | 3 | 91.5 ± 1.9                            | 3  |
| M300A (5.65)                 | 9.18 ± 0.11       | 0.15 ± 0.009 <sup>****a)</sup> | 46.9 ± 3.3             | 3 | 109.7 ± 14.0                          | 3  |
| V325A (6.37)                 | 9.39 ± 0.08       | 0.20 ± 0.009 <sup>****a)</sup> | 63.5 ± 3.3             | 3 | 89.5 ± 11.9                           | 3  |

(e) Related to Fig. 5c.

| ET <sub>B</sub> R constructs | pEC <sub>50</sub> | E <sub>max</sub>           | E <sub>max</sub> , %WT | n | relative ET <sub>B</sub> R expression | n  |
|------------------------------|-------------------|----------------------------|------------------------|---|---------------------------------------|----|
| WT (100%)                    | 9.66 ± 0.05       | 0.29 ± 0.008               | 100 ± 3.2              | 5 | 100                                   | 11 |
| H314A (6.26)                 | 9.59 ± 0.06       | 0.27 ± 0.009               | 90.2 ± 3.5             | 3 | 62.7 ± 6.4                            | 3  |
| R318A (6.30)                 | 9.31 ± 0.06       | 0.26 ± 0.009               | 88.2 ± 3.3             | 3 | 102.4 ± 16.2                          | 3  |
| T324A (6.36)                 | 9.53 ± 0.06       | 0.23 ± 0.008 <sup>b)</sup> | 77.3 ± 3.0             | 3 | 71.4 ± 2.2                            | 3  |
| V389A (7.56)                 | 9.60 ± 0.06       | 0.28 ± 0.009               | 96.3 ± 3.6             | 3 | 69.6 ± 5.5                            | 3  |
| K391A (8.48)                 | 9.59 ± 0.05       | 0.27 ± 0.008               | 91.2 ± 2.9             | 3 | 61.9 ± 10.6                           | 3  |

(f) Related to Fig. 5d.

| Gα <sub>i</sub> constructs | pEC <sub>50</sub> | E <sub>max</sub>             | E <sub>max</sub> , %WT | n |
|----------------------------|-------------------|------------------------------|------------------------|---|
| WT                         | 9.32 ± 0.05       | 0.30 ± 0.008                 | 100 ± 3.0              | 3 |
| F354A (H5.26)              | 9.25 ± 0.04       | 0.26 ± 0.006 <sup>**</sup>   | 87.8 ± 2.2             | 3 |
| L353A (H5.25)              | 9.48 ± 0.15       | 0.05 ± 0.004 <sup>****</sup> | 7.8 ± 1.6              | 3 |
| G352A (H5.24)              | 9.02 ± 0.05       | 0.20 ± 0.005 <sup>****</sup> | 61.8 ± 1.9             | 3 |
| C351A (H5.23)              | 9.20 ± 0.04       | 0.26 ± 0.005 <sup>***</sup>  | 87.0 ± 1.9             | 3 |
| D350A (H5.22)              | 9.40 ± 0.04       | 0.28 ± 0.005                 | 92.2 ± 2.1             | 3 |
| N347A (H5.19)              | 9.43 ± 0.04       | 0.29 ± 0.007                 | 96.5 ± 2.5             | 3 |
| K345A (H5.17)              | 9.06 ± 0.06       | 0.16 ± 0.005 <sup>****</sup> | 48.9 ± 1.9             | 3 |
| D341A (H5.13)              | 9.51 ± 0.04       | 0.28 ± 0.006                 | 92.1 ± 2.4             | 3 |

**Supplementary Table 2: ET-1-induced activation of WT and mutant ET<sub>B</sub> receptors in the G<sub>s</sub>-mediated cAMP accumulation assay.** Data were collected through the cAMP accumulation assay in parallel. pEC<sub>50</sub> and E<sub>max</sub> estimates represent average value and standard error of the mean (SEM), respectively, from three to five independent experiments performed in duplicate. “N.D.” is used to denote cases where no activity was detected. <sup>a), b), and c)</sup>; Statistical differences from wild type (75%), wild type (50%), and wild type (25%) were analyzed using ANOVA with Dunnett’s multiple comparison of means test, respectively. <sup>d)</sup>; Statistical difference from wild type (100%) was determined using Student’s *t*-test. Significance levels are indicated as (\*\*\*\**p* < 0.0001, \*\*\**p* < 0.001, \*\**p* < 0.01, \**p* < 0.05 vs WT).

**(a)** Related to Supplementary Fig. 10a

| ET <sub>B</sub> R constructs | pEC <sub>50</sub> | E <sub>max</sub> , %WT | n | relative ET <sub>B</sub> R expression | n |
|------------------------------|-------------------|------------------------|---|---------------------------------------|---|
| WT                           | 8.52 ± 0.03       | 99.9 ± 1.4             | 5 | 100                                   | 3 |
| N134A (ICL1)                 | 8.79 ± 0.25       | 20.3 ± 2.2****a)       | 3 | 80.2 ± 10.4                           | 3 |
| D198A (3.49)                 | 8.95 ± 0.16       | 48.2 ± 3.5****a)       | 3 | 73.1 ± 3.4                            | 3 |
| R199A (3.50)                 | N.D.              | N.D.                   | 3 | 87.5 ± 11.7                           | 3 |
| Y293F (5.58)                 | N.D.              | N.D.                   | 3 | 90.4 ± 4.4                            | 3 |
| N382A (7.49)                 | N.D.              | N.D.                   | 3 | 63.9 ± 8.3                            | 3 |
| S390A (8.47)                 | 8.89 ± 0.86       | 2.9 ± 1.1****b)        | 3 | 48.0 ± 4.8                            | 3 |

**(b)** Related to Supplementary Fig. 10b

| ET <sub>B</sub> R constructs | pEC <sub>50</sub> | E <sub>max</sub> , %WT | n | relative ET <sub>B</sub> R expression | n |
|------------------------------|-------------------|------------------------|---|---------------------------------------|---|
| WT                           | 8.39 ± 0.05       | 99.7 ± 2.1             | 3 | 100                                   | 3 |
| L386Y (7.53)                 | 8.52 ± 0.29       | 4.9 ± 0.6****c)        | 3 | 37.4 ± 2.0                            | 3 |
| L386A (7.53)                 | 8.23 ± 0.31       | 2.9 ± 0.4****c)        | 3 | 33.3 ± 5.2                            | 3 |
| L386N (7.53)                 | N.D.              | N.D.                   | 3 | 36.1 ± 3.3                            | 3 |
| L386I (7.53)                 | 8.60 ± 0.13       | 25.8 ± 1.3****a)       | 3 | 78.0 ± 9.5                            | 3 |
| L386V (7.53)                 | 8.40 ± 0.13       | 26.3 ± 1.4****b)       | 3 | 58.6 ± 1.6                            | 3 |

(c) Related to Supplementary Fig. 10c

| ET <sub>B</sub> R constructs | pEC <sub>50</sub> | E <sub>max</sub> , %WT       | n | relative ET <sub>B</sub> R expression | n |
|------------------------------|-------------------|------------------------------|---|---------------------------------------|---|
| WT                           | 8.52 ± 0.03       | 99.9 ± 1.4                   | 5 | 100                                   | 3 |
| M296A (5.61)                 | N.D.              | N.D.                         | 3 | 93.6 ± 2.3                            | 3 |
| M300A (5.65)                 | N.D.              | N.D.                         | 3 | 74.7 ± 9.3                            | 3 |
| H314A (6.26)                 | 8.69 ± 0.11       | 85.9 ± 4.1 <sup>b)</sup>     | 3 | 49.9 ± 5.3                            | 3 |
| R318A (6.30)                 | 8.31 ± 0.15       | 17.2 ± 1.0 <sup>****a)</sup> | 3 | 79.0 ± 5.2                            | 3 |
| T324A (6.36)                 | 8.54 ± 0.08       | 39.4 ± 1.2 <sup>****d)</sup> | 3 | 91.8 ± 8.6                            | 3 |
| V325A (6.37)                 | 8.74 ± 0.20       | 8.3 ± 0.7 <sup>****b)</sup>  | 3 | 50.3 ± 8.5                            | 3 |
| V389A (7.56)                 | 8.80 ± 0.07       | 33.2 ± 1.1 <sup>****b)</sup> | 3 | 63.6 ± 8.8                            | 3 |
| K391A (8.48)                 | 8.59 ± 0.07       | 69.3 ± 1.9 <sup>**a)</sup>   | 3 | 67.8 ± 7.5                            | 3 |

(d) Related to Supplementary Fig. 10d

| WT ET <sub>B</sub> R | pEC <sub>50</sub> | E <sub>max</sub> , %WT | n |
|----------------------|-------------------|------------------------|---|
| 100%                 | 8.21 ± 0.09       | 97.2 ± 3.7             | 3 |
| 75%                  | 8.36 ± 0.08       | 79.5 ± 2.7             | 3 |
| 50%                  | 8.54 ± 0.11       | 49.2 ± 2.2             | 3 |
| 25%                  | 8.77 ± 0.16       | 19.8 ± 1.4             | 3 |
| 0%                   | N.D.              | N.D.                   | 2 |

(e) Related to Supplementary Fig. 10e

| ET <sub>B</sub> R constructs | pEC <sub>50</sub> | E <sub>max</sub> | n |
|------------------------------|-------------------|------------------|---|
| WT                           | 8.46 ± 0.05       | 10.15 ± 0.17     | 3 |
| vehicle                      | N.D.              | N.D.             | 2 |

**Supplementary Table 3: List of contacts between ET<sub>B</sub>R and Gα<sub>i</sub>.**

| <b>Gα<sub>i</sub> residue</b> | <b>ET<sub>B</sub>R residue</b>                                                                                       | <b>Type of interaction</b>                                                                                           |
|-------------------------------|----------------------------------------------------------------------------------------------------------------------|----------------------------------------------------------------------------------------------------------------------|
| L194 <sup>S3.1</sup>          | I209 <sup>ICL2</sup>                                                                                                 | Nonbonded contact                                                                                                    |
| T340 <sup>H5.12</sup>         | W206 <sup>ICL2</sup>                                                                                                 | Nonbonded contact                                                                                                    |
| D341 <sup>H5.13</sup>         | H314 <sup>6.26</sup><br>R318 <sup>6.30</sup>                                                                         | Nonbonded contact<br>Hydrogen bond                                                                                   |
| I343 <sup>H5.15</sup>         | I209 <sup>ICL2</sup>                                                                                                 | Nonbonded contact                                                                                                    |
| I344 <sup>H5.16</sup>         | W206 <sup>ICL2</sup><br>V203 <sup>3.54</sup>                                                                         | Nonbonded contact<br>Nonbonded contact                                                                               |
| N346 <sup>H5.18</sup>         | K210 <sup>ICL2</sup>                                                                                                 | Nonbonded contact                                                                                                    |
| N347 <sup>H5.19</sup>         | A202 <sup>3.53</sup><br>R208 <sup>ICL2</sup>                                                                         | Nonbonded contact<br>Hydrogen bond                                                                                   |
| L348 <sup>H5.20</sup>         | V203 <sup>3.54</sup><br>M300 <sup>5.65</sup>                                                                         | Nonbonded contact<br>Nonbonded contact                                                                               |
| D350 <sup>H5.22</sup>         | N134 <sup>ICL1</sup><br>K210 <sup>ICL2</sup>                                                                         | Hydrogen bond with peptide backbone<br>Hydrogen bond                                                                 |
| C351 <sup>H5.23</sup>         | P136 <sup>2.39</sup><br>R199 <sup>3.50</sup>                                                                         | Nonbonded contact<br>Nonbonded contact                                                                               |
| G352 <sup>H5.24</sup>         | L386 <sup>7.53</sup><br>S390 <sup>8.47</sup>                                                                         | Nonbonded contact<br>Hydrogen bond with peptide backbone                                                             |
| L353 <sup>H5.25</sup>         | R199 <sup>3.50</sup><br>M296 <sup>5.61</sup><br>V321 <sup>6.33</sup><br>V325 <sup>6.37</sup><br>V389 <sup>7.56</sup> | Nonbonded contact<br>Nonbonded contact<br>Nonbonded contact<br>Nonbonded contact<br>Nonbonded contact                |
| F354 <sup>H5.26</sup>         | Q317 <sup>6.29</sup><br>V321 <sup>6.33</sup><br>V389 <sup>7.56</sup><br>S390 <sup>8.47</sup>                         | Nonbonded contact<br>Nonbonded contact<br>Hydrogen bond with peptide backbone<br>Hydrogen bond with peptide backbone |

**Supplementary Table 4: Saturation binding using [<sup>125</sup>I]ET-1 and HEK293A cell membranes expressing each mutant protein.** The  $K_d$  values are presented as mean  $\pm$  SEM (pM), representing data from three independent experiments conducted in duplicates.

| <b>ET<sub>B</sub>R construct</b> | <b><math>K_d</math> (pM)</b> |
|----------------------------------|------------------------------|
| WT                               | 16.8 $\pm$ 1.7               |
| N134A <sup>ICL1</sup>            | 14.0 $\pm$ 2.4               |
| D198A <sup>3.49</sup>            | 14.9 $\pm$ 1.0               |
| R199A <sup>3.50</sup>            | 15.5 $\pm$ 0.5               |
| Y293F <sup>5.58</sup>            | 15.2 $\pm$ 0.3               |
| M296A <sup>5.61</sup>            | 19.1 $\pm$ 1.9               |
| M300A <sup>5.65</sup>            | 17.3 $\pm$ 4.0               |
| T324M <sup>6.36</sup>            | 17.7 $\pm$ 3.4               |
| V325A <sup>6.37</sup>            | 17.3 $\pm$ 2.2               |
| N382A <sup>7.49</sup>            | 15.1 $\pm$ 1.1               |
| S390A <sup>8.47</sup>            | 16.3 $\pm$ 1.4               |

**Supplementary Table 5: Frequency of hydrogen bond occurrence in MD simulations.**

|                                             | run1  | run2  | run3  | all   |
|---------------------------------------------|-------|-------|-------|-------|
| D341 <sup>H5.13</sup> -R318 <sup>6.30</sup> | 0.969 | 0.341 | 0.960 | 0.757 |
| N347 <sup>H5.19</sup> -R208 <sup>ICL2</sup> | 0.200 | 0.010 | 0.005 | 0.071 |
| D350 <sup>H5.22</sup> -N134 <sup>ICL1</sup> | 0.654 | 0.419 | 0.138 | 0.404 |
| F354 <sup>H5.26</sup> -S390 <sup>8.47</sup> | 0.686 | 0.987 | 0.412 | 0.695 |
| D147 <sup>2.50</sup> -N382 <sup>7.49</sup>  | 0.995 | 0.951 | 0.078 | 0.675 |
| D147 <sup>2.50</sup> -S379 <sup>7.46</sup>  | 0.999 | 0.999 | 0.984 | 0.994 |
| R199 <sup>3.50</sup> -Y293 <sup>5.58</sup>  | 0.631 | 0.449 | 0.050 | 0.377 |



**Supplementary Table 6: System setup of the MD simulations**

|                       |                                                                                                 |
|-----------------------|-------------------------------------------------------------------------------------------------|
| System                | ET-1-bound ET <sub>B</sub> R-G <sub>i</sub> ,<br>453 POPC,<br>64,293 TIP3P water,<br>0.15 M KCl |
| Total number of atoms | 270,932                                                                                         |
| Simulation box        | 130 Å × 130 Å × 171 Å                                                                           |
| Number of simulations | 3                                                                                               |

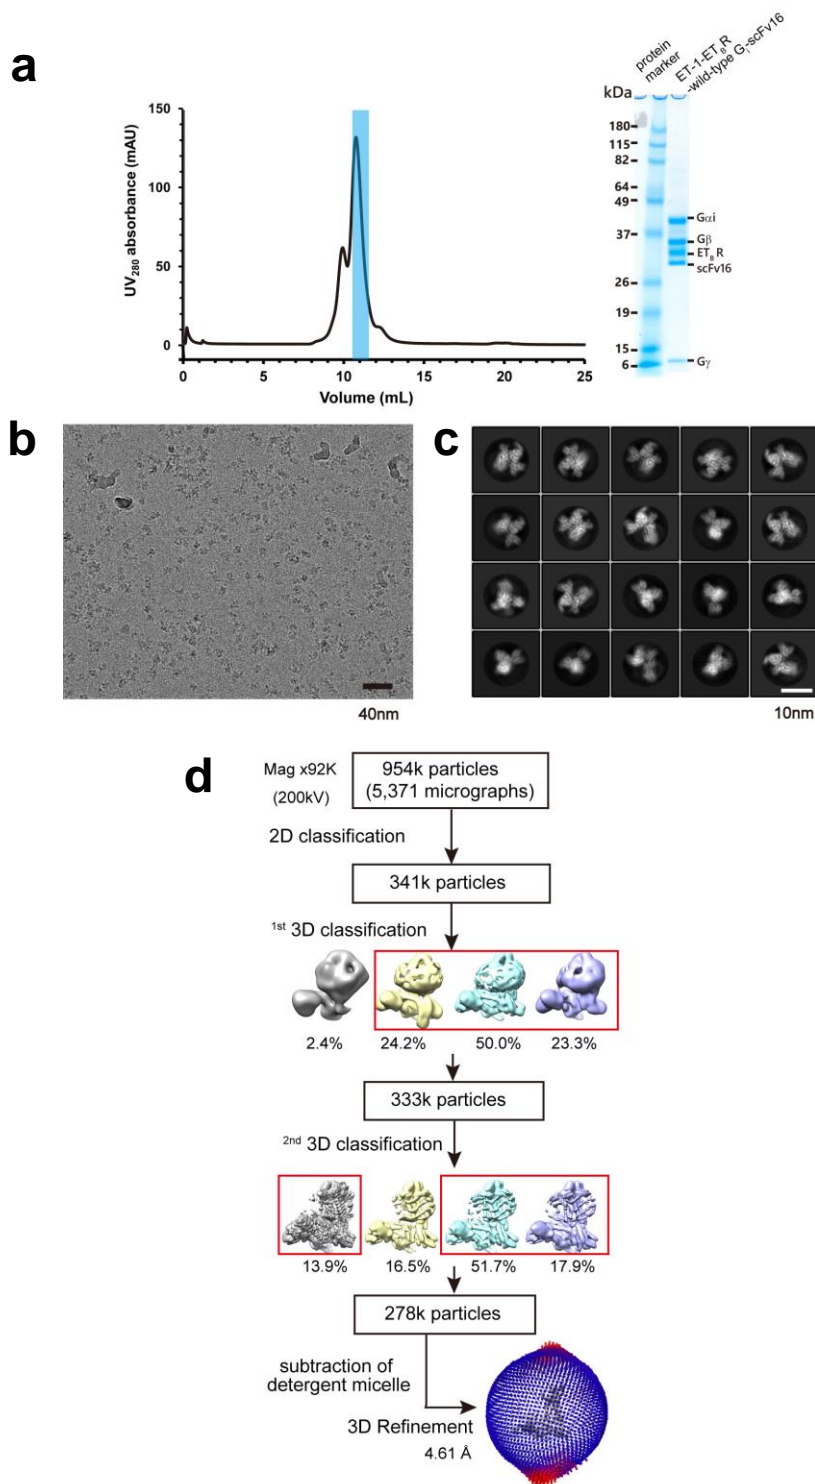

**Supplementary Fig. 1: Structure determination of ET-1-ET<sub>B</sub>R-wild-type G<sub>i</sub>-scFv16 by cryo-EM.** (a) (left) Representative elution profiles of the ET-1-ET<sub>B</sub>R-wild-type G<sub>i</sub>-scFv16 complex on a Superdex 200 Increase 10/300 GL gel-filtration column. The used fraction of column volume is indicated by a cyan box. (right) SDS-PAGE of the purified ET-1-ET<sub>B</sub>R-wild type G<sub>i</sub>-scFv16 complex. (b) A representative micrograph of the ET-1-ET<sub>B</sub>R-wild type G<sub>i</sub>-scFv16 complex. (c) Representative 2D class averages from micrographs. (d) Image processing flow of 3D classification and reconstruction. Angular distribution of reconstructed particles used in the final refinement.

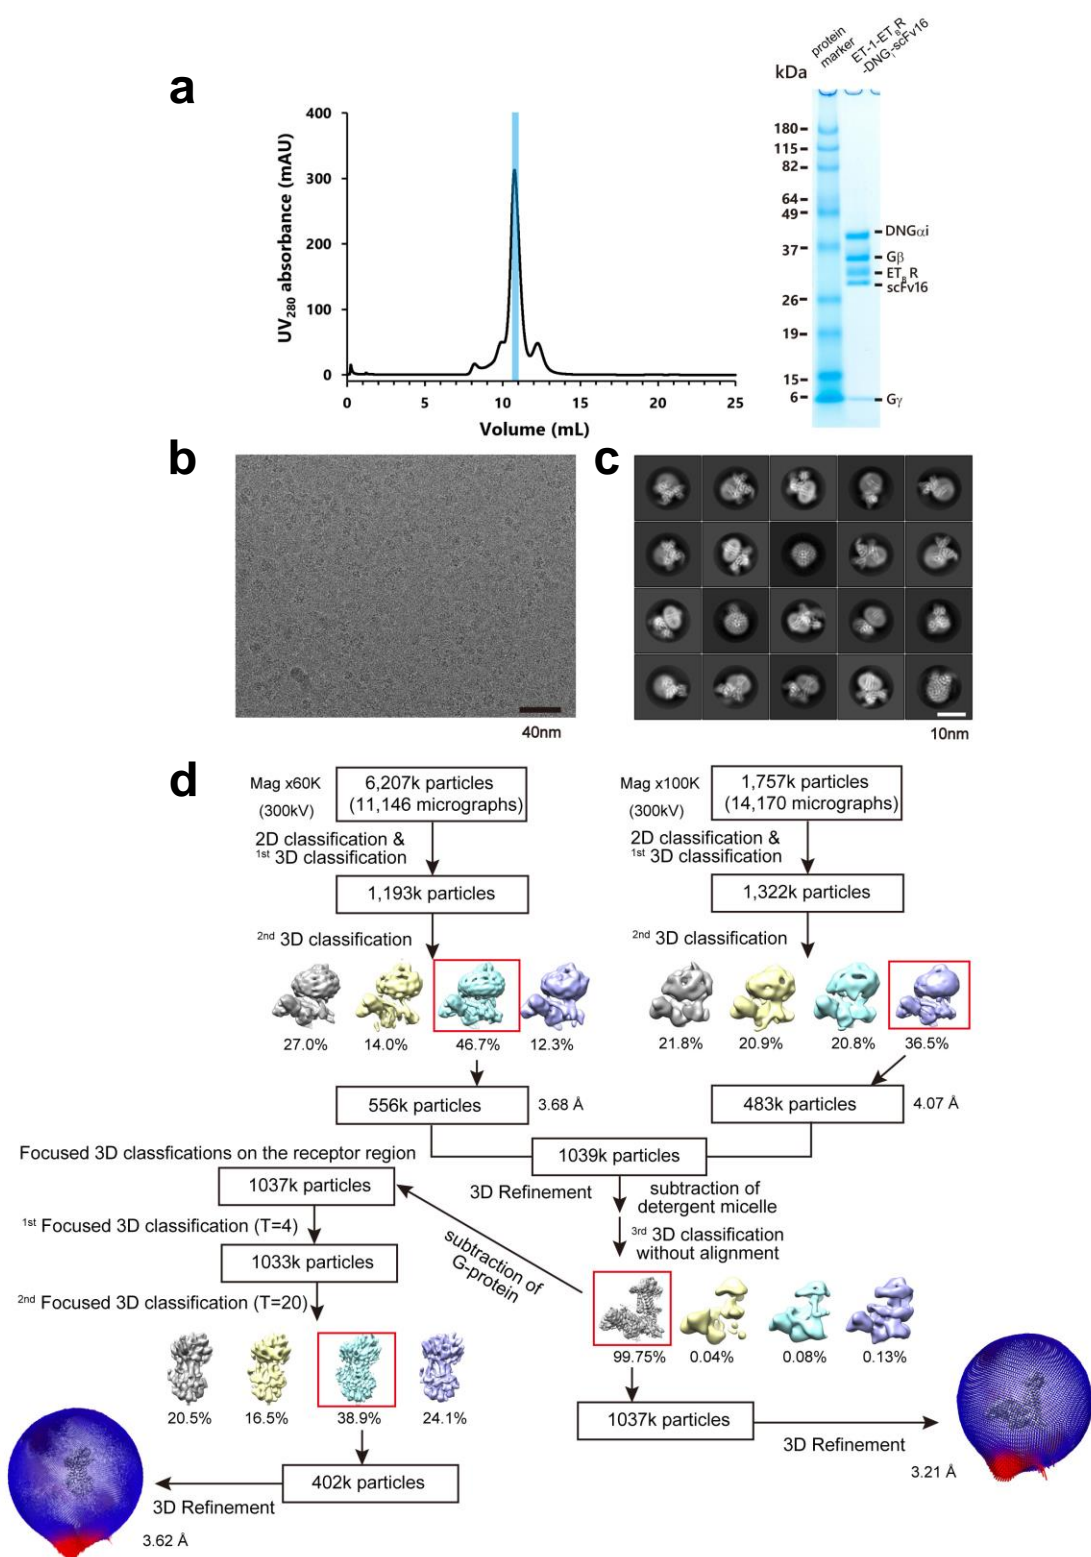

**Supplementary Fig. 2: Structure determination of ET-1-ET<sub>B</sub>R-DNG<sub>1</sub>-scFv16 by cryo-EM.** (a) (left) Representative elution profiles of the ET-1-ET<sub>B</sub>R-DNG<sub>1</sub>-scFv16 complex on a Superdex 200 Increase 10/300 GL gel-filtration column. The used fraction of column volume is indicated by a cyan box. (middle) SDS-PAGE of the purified ET-1-ET<sub>B</sub>R-DNG<sub>1</sub>-scFv16 complex. (right) The uncropped gel image. (b) A representative micrograph of the ET-1-ET<sub>B</sub>R-DNG<sub>1</sub>-scFv16 complex. (c) Representative 2D class averages from micrographs. (d) Image processing flow of 3D classification and reconstruction. Angular distribution of reconstructed particles used in the final refinement.

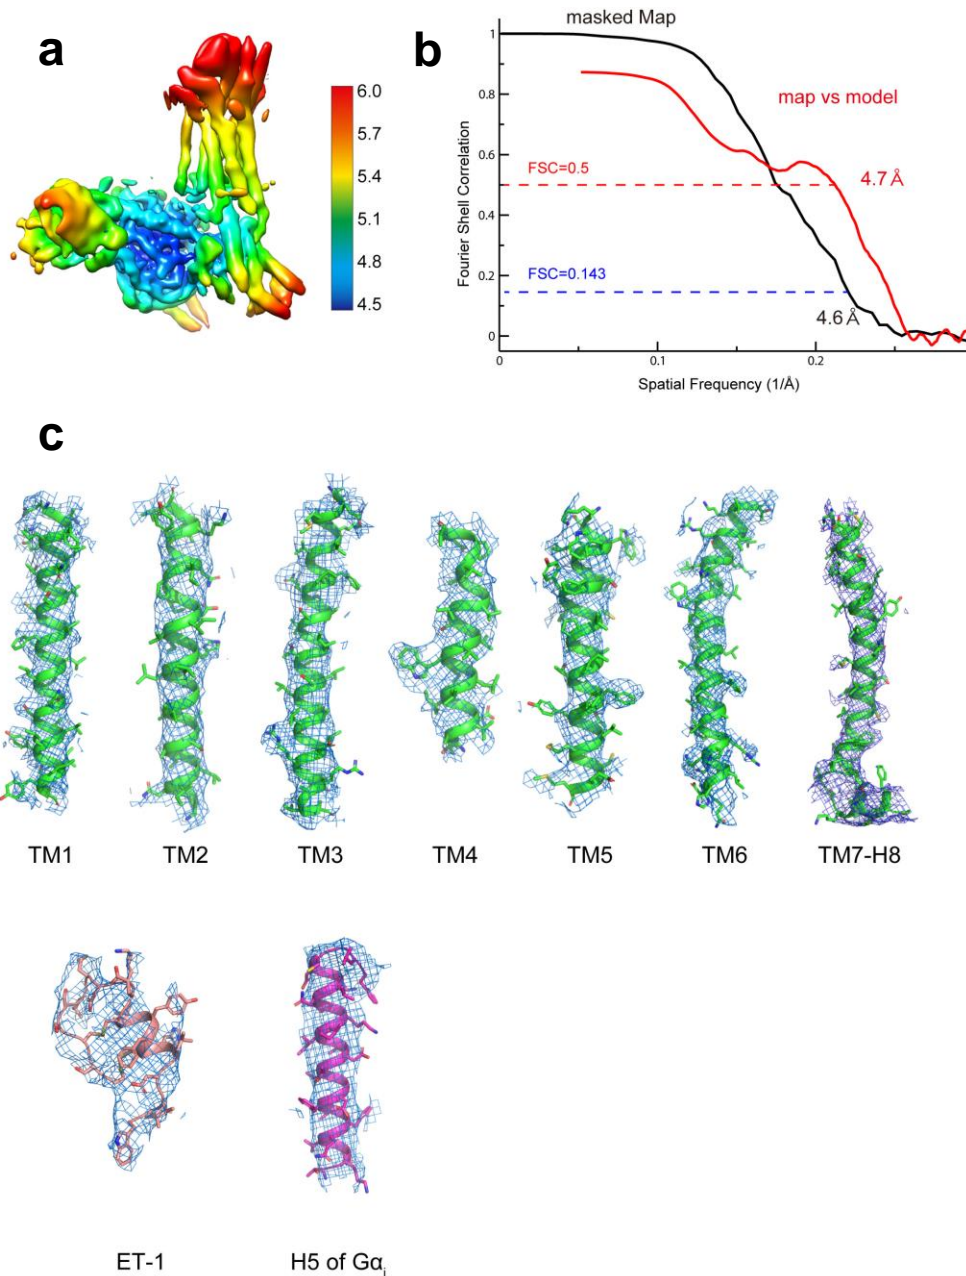

**Supplementary Fig. 3: Cryo-EM densities and structural models in the ET-1-ET<sub>B</sub>R-wild-type G<sub>i</sub>-scFv16 complex.** (a) The overall structure of the ET-1 bound ET<sub>B</sub>R-wild-type G<sub>i</sub> complex is represented in rainbow colors according to local resolution (shown in the color bar on the right). (b) Fourier shell correlation (FSC) plots of the cryo-EM map (masked: black) and the FSC plot of the model versus the final map (red) are superimposed. Global resolution defined at FSC = 0.143 is 4.61. (c) Selected regions of the cryo-EM density superimposed on selected regions of the refined model. The density maps are shown at a contour level of 4.5  $\sigma$ . The color codes are the same as those in Fig. 1.

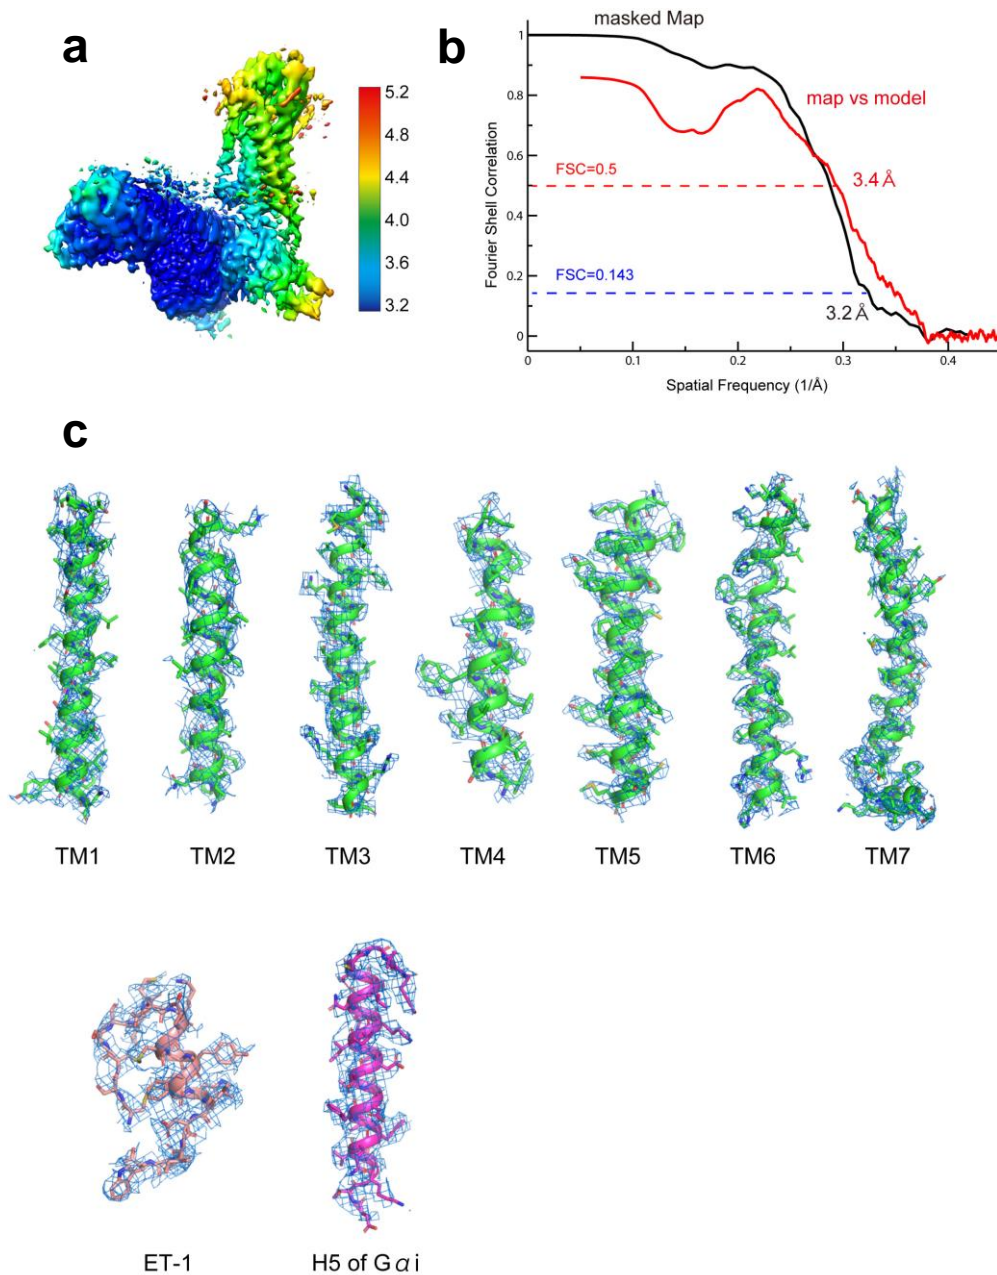

**Supplementary Fig. 4: Cryo-EM densities and structural models in the ET-1-ET<sub>B</sub>R-DNG<sub>1</sub>-scFv16 complex.** (a) Overall structure of the ET-1 bound ET<sub>B</sub>R-DNG<sub>1</sub> complex is represented in rainbow colors according to local resolution (shown in the color bar on the right). (b) Fourier shell correlation (FSC) plots of the cryo-EM map (masked: black) and the FSC plot of the model versus the final map (red) are superimposed. Global resolution at FSC = 0.143 is 3.21. (c) Selected regions of the cryo-EM density superimposed on selected regions of the refined model. The density maps are shown at a contour level of 4.0  $\sigma$ . The color codes are the same as those in Fig. 1.

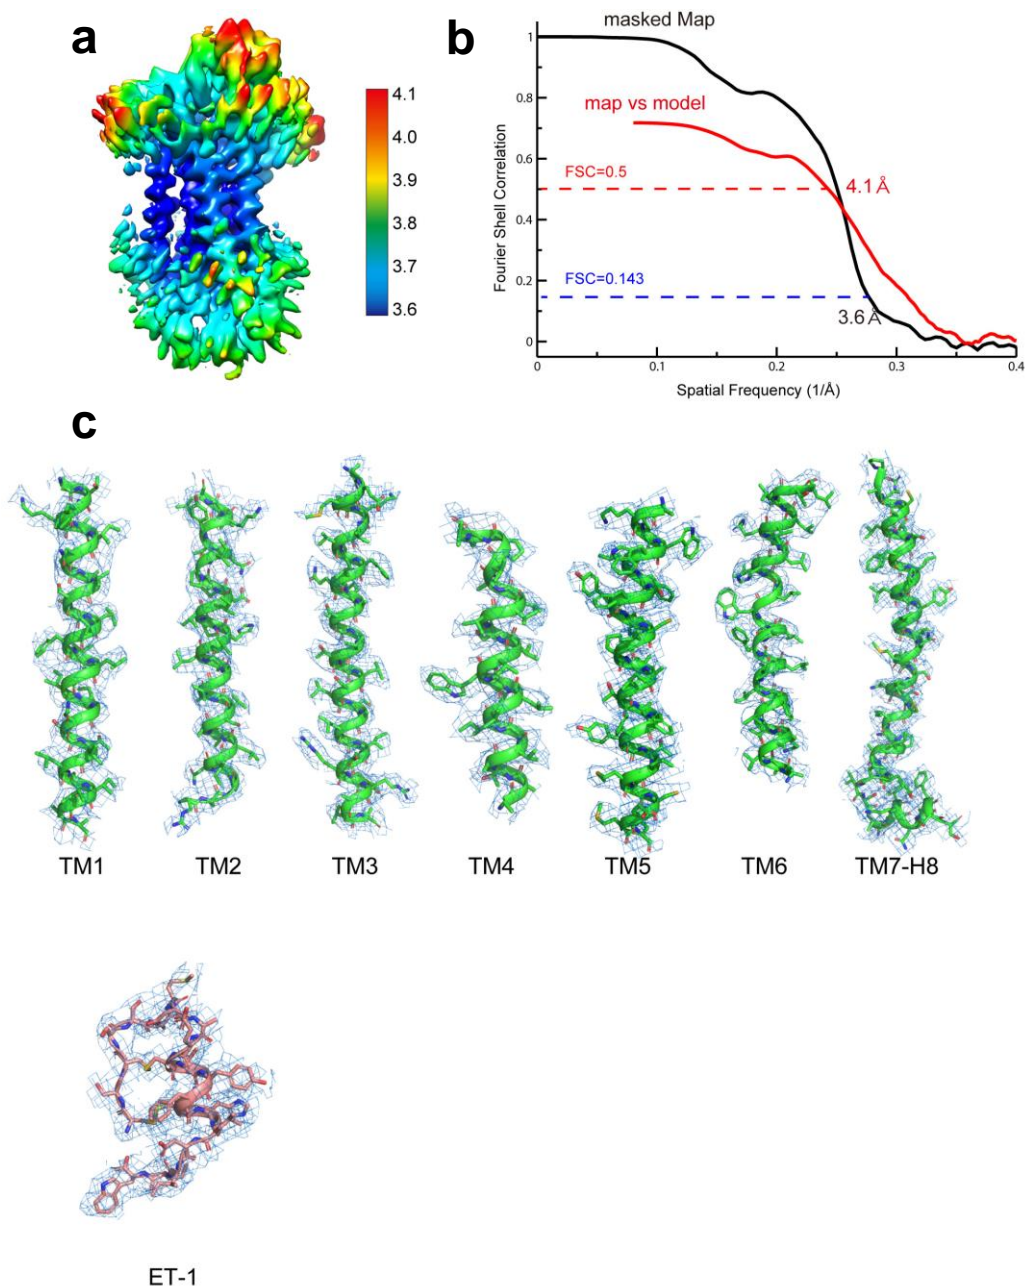

**Supplementary Fig. 5: Cryo-EM densities and structural models after the 3D focused refinement on the receptor in ET-1-ET<sub>B</sub>R complex.** (a) Overall structure of the ET-1 bound ET<sub>B</sub>R complex is represented in rainbow colors according to local resolution (shown in the color bar on the right). (b) Fourier shell correlation (FSC) plots of the cryo-EM map (masked: black) and the FSC plot of the model versus the final map (red) are superimposed. Global resolution at FSC = 0.143 is 3.62. (c) Selected regions of the cryo-EM density superimposed on selected regions of the refined model. The density maps are shown at a contour level of 4.0  $\sigma$ . The color codes are the same as those in Fig. 1.

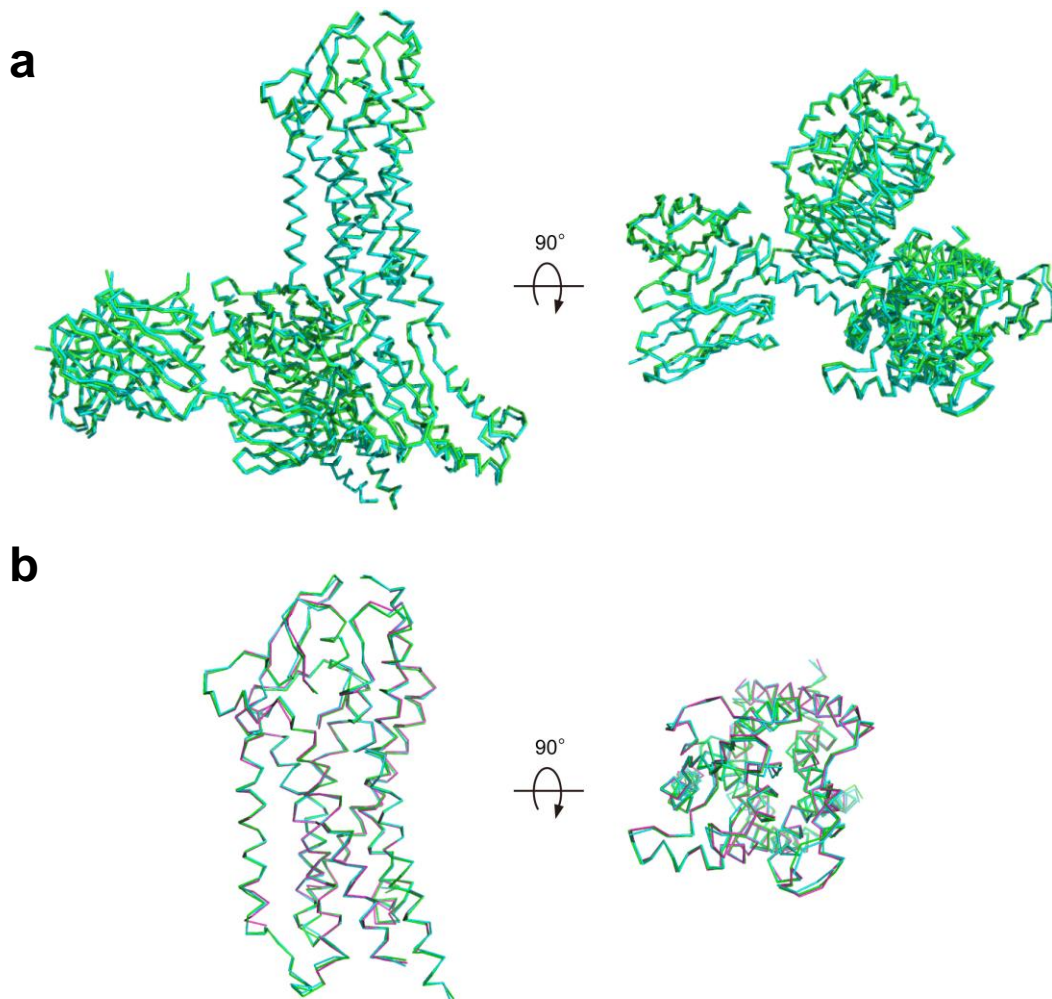

**Supplementary Fig. 6: Structural comparison of the ET-1-ET<sub>B</sub>R-DNG<sub>i</sub>-scFv16 complex and the ET-1-ET<sub>B</sub>R-wild-type G<sub>i</sub>-scFv16 complex.** (a) Side and top view displaying the superposition of the ET-1 bound ET<sub>B</sub>R-DNG<sub>i</sub> complex (in green) with the ET-1 bound ET<sub>B</sub>R-wild-type G<sub>i</sub> complex (in cyan). The overall RMSD of the C $\alpha$  atoms between them is 0.662. (b) Side and top view displaying the superposition of the ET-1 bound ET<sub>B</sub>R complexes (green for the ET<sub>B</sub>R-DNG<sub>i</sub>, cyan for the ET<sub>B</sub>R-wild-type G<sub>i</sub>, and magenta for the focused 3D refinement on the receptor in the ET<sub>B</sub>R-DNG<sub>i</sub>). The overall RMSD of the C $\alpha$  atoms between ET-1 bound receptors compared to the reference receptor model in the ET<sub>B</sub>R-DNG<sub>i</sub> are measured at 0.391 for the ET<sub>B</sub>R-wild-type G<sub>i</sub> and 0.364 for the focused 3D refinement of ET<sub>B</sub>R in the ET<sub>B</sub>R-DNG<sub>i</sub>.

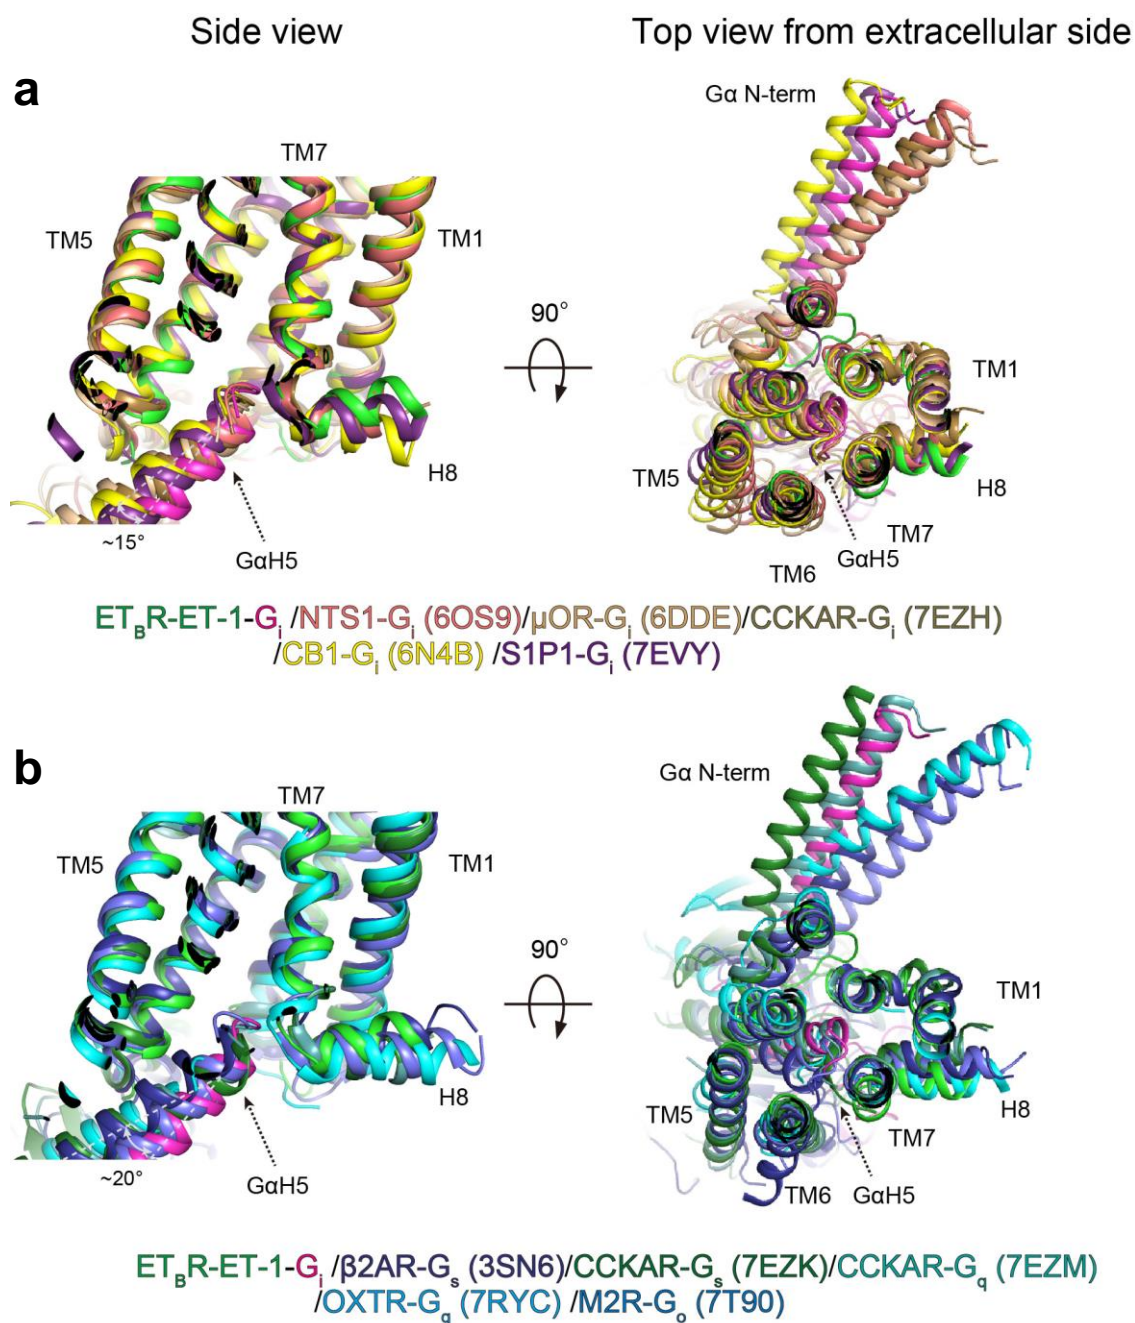

**Supplementary Fig. 7: Structural comparison of the ET-1-ET<sub>B</sub>R-DNG<sub>i</sub>-scFv16 complex with other GPCR-G complexes.** (a) Side and extracellular top views showing the superposition of the ET-1 bound ET<sub>B</sub>R-DNG<sub>i</sub> complex (green and magenta) with other GPCR-G<sub>i</sub> complexes. The contact surface area between the receptor and G<sub>i</sub> subunit is as follows: 1132 Å<sup>2</sup> for ET<sub>B</sub>R-DNG<sub>i</sub>, 1095 Å<sup>2</sup> for NTS1-G<sub>i</sub>, 1208 Å<sup>2</sup> for μOR-G<sub>i</sub>, 1146 Å<sup>2</sup> for CCKAR-G<sub>i</sub>, 910 Å<sup>2</sup> for CB1-G<sub>i</sub>, and 1426 Å<sup>2</sup> for S1P1-G<sub>i</sub>. (b) Side and extracellular top views showing the superposition of the ET-1 bound ET<sub>B</sub>R-DNG<sub>i</sub> complex (green and magenta) with the GPCR-G<sub>s</sub>, -G<sub>q</sub>, and -G<sub>o</sub> complexes. The contact surface area between the receptor and G subunit is as follows: 1327 Å<sup>2</sup> for βAR-G<sub>s</sub>, 1365 Å<sup>2</sup> for CCKAR-G<sub>s</sub>, 1508 Å<sup>2</sup> for CCKAR-G<sub>q</sub>, 724 Å<sup>2</sup> for OXTR-G<sub>q</sub>, and 1038 Å<sup>2</sup> for M2R-G<sub>o</sub>. Contact surfaces were calculated using AREAIMOL in the CCP4 software suite<sup>S1</sup>.



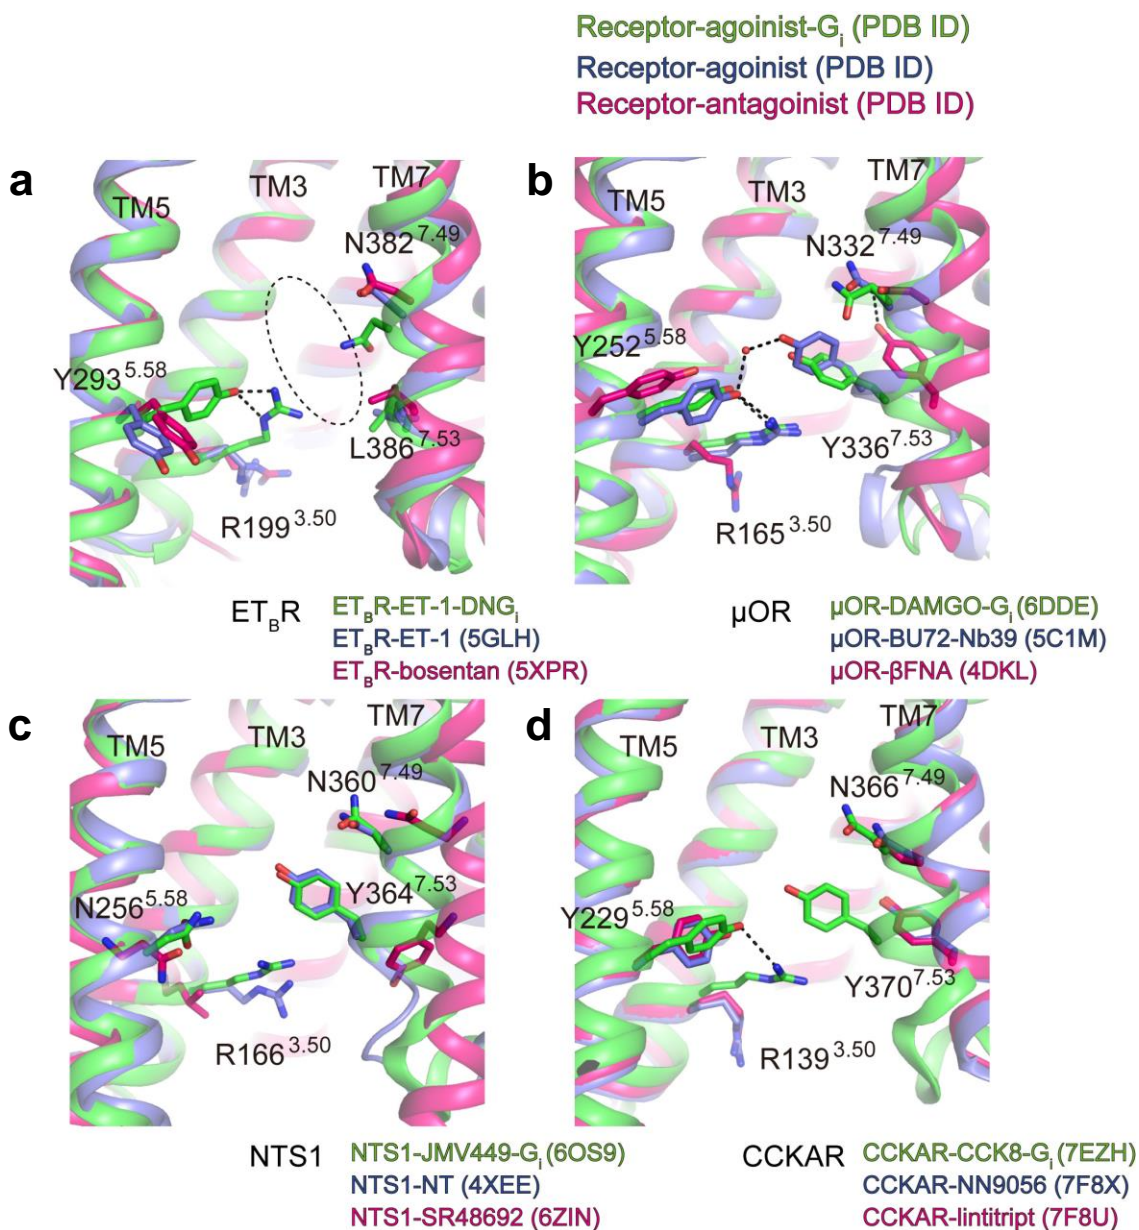

**Supplementary Fig. 8: Structural comparison of ET<sub>B</sub>R with other GPCRs.** A comparison of the activation-dependent inward movement of TM7 in ET<sub>B</sub>R and three GPCRs: μOR-G<sub>i</sub>, NTS1-G<sub>i</sub>, and CCKAR-G<sub>i</sub>. The active state of the N<sup>7.49</sup>P<sup>7.50</sup>xxY<sup>7.53</sup> motif exhibits a similar conformation but differs from that of the N<sup>7.49</sup>P<sup>7.50</sup>xxL<sup>7.53</sup> motif, resulting in the creation of a cavity (indicated by a dashed oval in (a)).

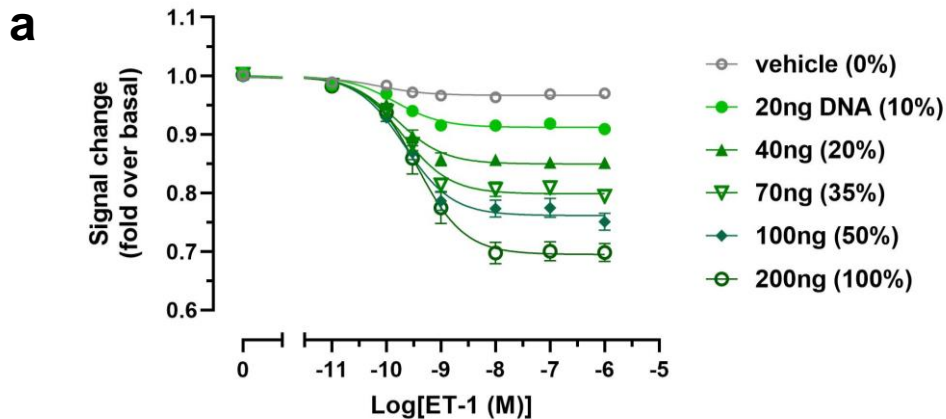

**b**

| WT ET <sub>B</sub> R | pEC <sub>50</sub> | E <sub>max</sub> | E <sub>max</sub> , %WT | n | relative ET <sub>B</sub> R expression | n |
|----------------------|-------------------|------------------|------------------------|---|---------------------------------------|---|
| 100%                 | 9.45 ± 0.09       | 0.30 ± 0.015     | 100 ± 5.5              | 3 | 100                                   | 3 |
| 50%                  | 9.67 ± 0.08       | 0.24 ± 0.011     | 76.5 ± 4.0             | 3 | 66.0 ± 29.2                           | 3 |
| 35%                  | 9.70 ± 0.07       | 0.20 ± 0.008     | 62.9 ± 2.9             | 3 | 38.2 ± 12.4                           | 3 |
| 25%                  | 9.71 ± 0.07       | 0.17 ± 0.007     | 52.4 ± 2.5             | 3 | 32.1 ± 8.1                            | 3 |
| 20%                  | 9.82 ± 0.09       | 0.15 ± 0.007     | 44.0 ± 2.6             | 3 | 22.4 ± 5.6                            | 3 |
| 10%                  | 9.84 ± 0.09       | 0.09 ± 0.004     | 20.8 ± 1.6             | 3 | 11.8 ± 2.8                            | 3 |
| 0%                   | N.D.              | N.D.             | N.D.                   | 3 | N.D.                                  | 4 |

**Supplementary Fig. 9: G<sub>i</sub> dissociation assay of ET<sub>B</sub>R.** (a) Presentation of G<sub>i</sub> dissociation assay results for WT ET<sub>B</sub>R at reduced levels of expression (%DNA transfected). WT (100%) corresponds to the transfection of 200 ng of wild-type ET<sub>B</sub>R expression plasmid for one well of a 6-well plate in G<sub>i</sub> dissociation assays, as described in the Methods section. (b) pEC<sub>50</sub> and E<sub>max</sub> estimates represent the average value and standard error of the mean (SEM), respectively, derived from three independent experiments performed in duplicate. N.D. indicates no detected activity.

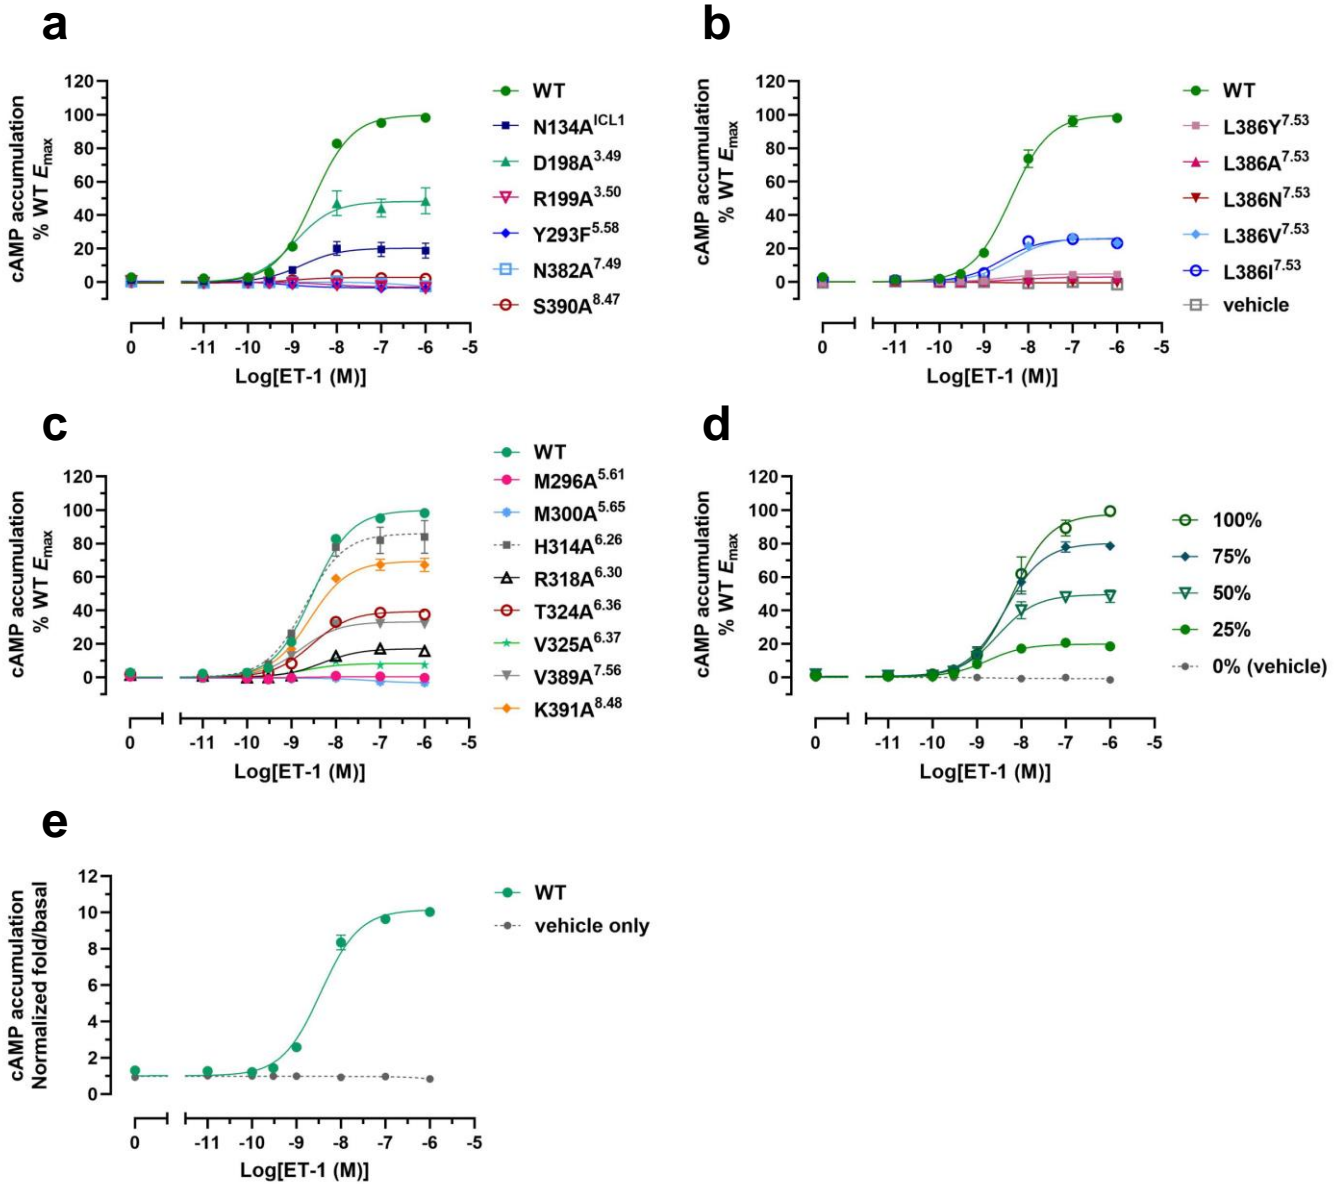

**Supplementary Fig. 10: ET-1-induced activation of WT and mutant  $ET_B$  receptors in the  $G_s$ -mediated cAMP accumulation assay.** (a–c)  $G_s$ -mediated cAMP accumulation activities of mutant receptors. Three independent experiments were performed in duplicate. (d) Signaling of reduced levels of WT  $ET_B$ R (%DNA transfected) for  $G_s$  is presented. WT (100%) corresponds to the transfection of 500 ng of  $ET_B$ R expression plasmid for one well of a 6-well plate in the cAMP accumulation assay, as described in the Methods section. The signals demonstrate a nearly proportional relationship with the amount of expressed receptors in the cAMP accumulation assays. (e) cAMP accumulation with increasing concentrations of ET-1 in the WT (100%) and vehicle transfected cells are represented as normalized fold/basal.

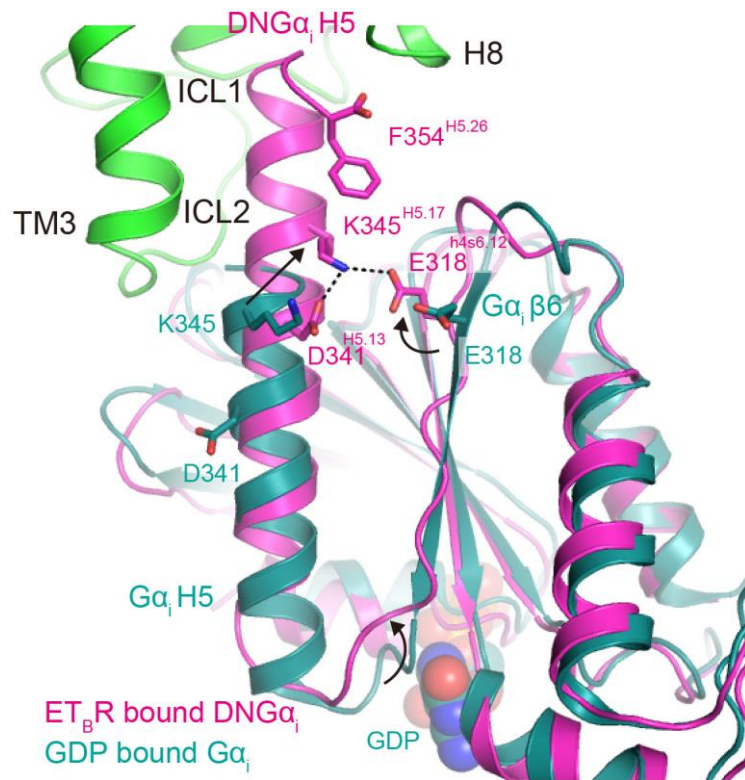

**Supplementary Fig. 11: Intramolecular interactions surrounding helix H5 of G $\alpha_i$ .** TM5 and 6 of ET<sub>B</sub>R are omitted for clarity. The translation and twist of helix H5 of G $\alpha_i$  during coupling with ET<sub>B</sub>R resulted in K345<sup>H5.17</sup> interacting with F354<sup>H5.26</sup>, D341<sup>H5.13</sup>, and E318<sup>h4s6.12</sup> within G $\alpha_i$ .

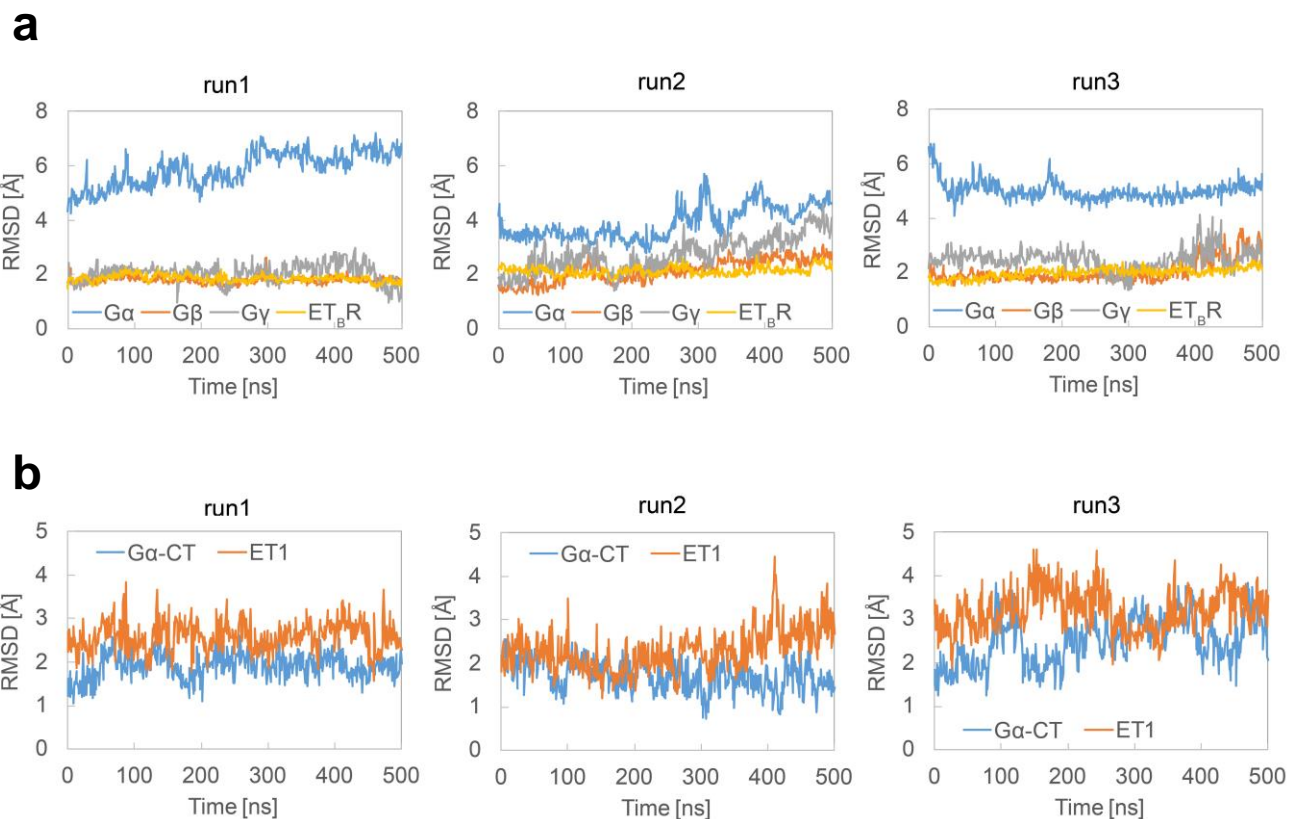

**Supplementary Fig. 12: Time evolution of  $C\alpha$  RMSDs.** The time evolution of  $C\alpha$  RMSDs is presented in two context types. **(a)** The  $C\alpha$  RMSDs of  $ET_{\beta}R$ ,  $G\alpha_i$ ,  $G\beta$ , and  $G\gamma$  are tracked relative to their initial structures. **(b)** The  $C\alpha$  RMSDs of  $ET1$  and C-terminal  $\alpha 5$  helix of  $G\alpha_i$  (residues 335–354) are monitored following the superposition of  $C\alpha$  atoms of  $ET_{\beta}R$  onto the initial structure.

**a**

|                   | TM5                                                                     | missing   | TM6 |
|-------------------|-------------------------------------------------------------------------|-----------|-----|
| ET <sub>B</sub> R | KTAKDWWLFSFYFCLPLAITAFFYTLMTCEMLRKKSGMQIALNDHLKQRREVAKTVFCLVLFALCWLPLH  | ■ ■ ■ ■ ■ |     |
| 6VMS              | NPAFVVYSSIVSFYVPFIVILLVYIKIYIVLRRRRKLVNTNRKLSQQKEKKATQLLAIYLGFLIICWLPFF |           |     |

**b**

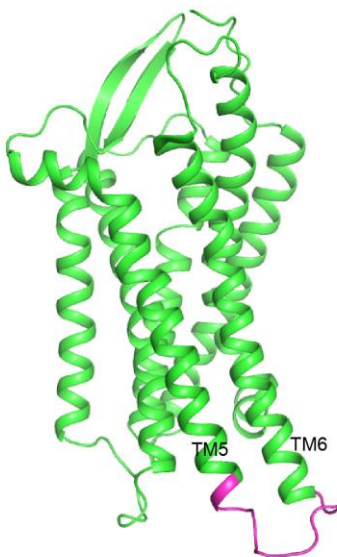

**Supplementary Fig. 13: Structural modeling of the missing region between TM5 and TM6.** (a) Sequence alignment of ET<sub>B</sub>R and D2 dopamine receptor (PDB ID: 6VMS). The resolved and unresolved region are shown as a green line and magenta dashed line, respectively. (b) The structure used in MD is colored as shown in (a). The intracellular loop between TM 5 and TM6 of D2 dopamine receptor was used as a template for the missing region of ET<sub>B</sub>R.

## Supplementary References

1. J. Agirre, M. Atanasova, H. Bagdonas, C.B. Ballard, A. Baslé, J. Beilsten-Edmands, R.J. Borges, D.G. Brown, J.J. Burgos-Mármol, J.M. Berrisford, P.S. Bond, I. Caballero, L. Catapano, G. Chojnowski, A.G. Cook, K.D. Cowtan, T.I. Croll, J.É. Debreczeni, N.E. Devenish, E.J. Dodson, T.R. Drevon, P. Emsley, G. Evans, P.R. Evans, M. Fando, J. Foadi, L. Fuentes-Montero, E.F. Garman, M. Gerstel, R.J. Gildea, K. Hatti, M.L. Hekkelman, P. Heuser, S.W. Hoh, M.A. Hough, H.T. Jenkins, E. Jiménez, The CCP4 suite: integrative software for macromolecular crystallography. *Acta Crystallogr. D Struct. Biol.* 79, 449-461 (2023)

Supplementary Fig. 14: Original uncropped gel images

Fig. S1(a)

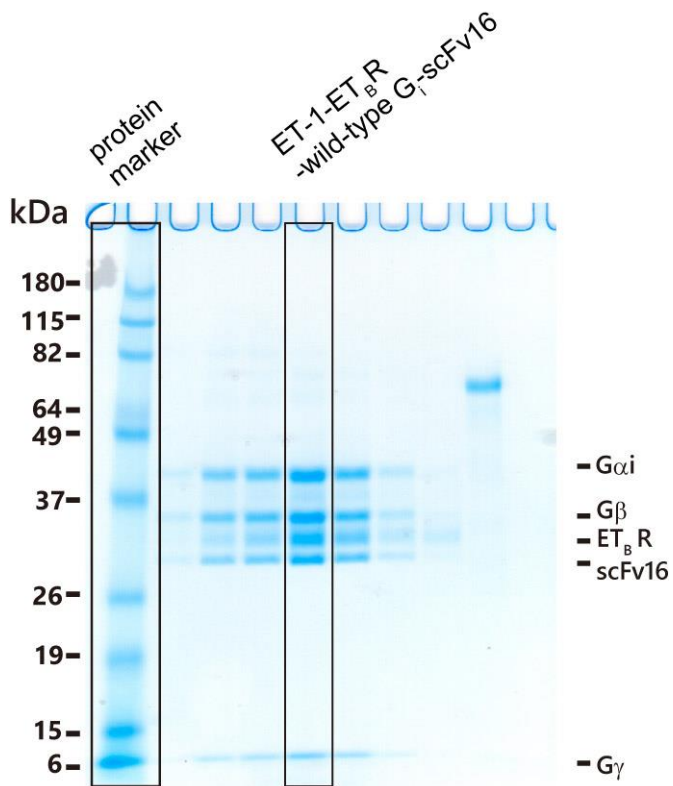

Uncropped gel image



**Fig. S2(a)**

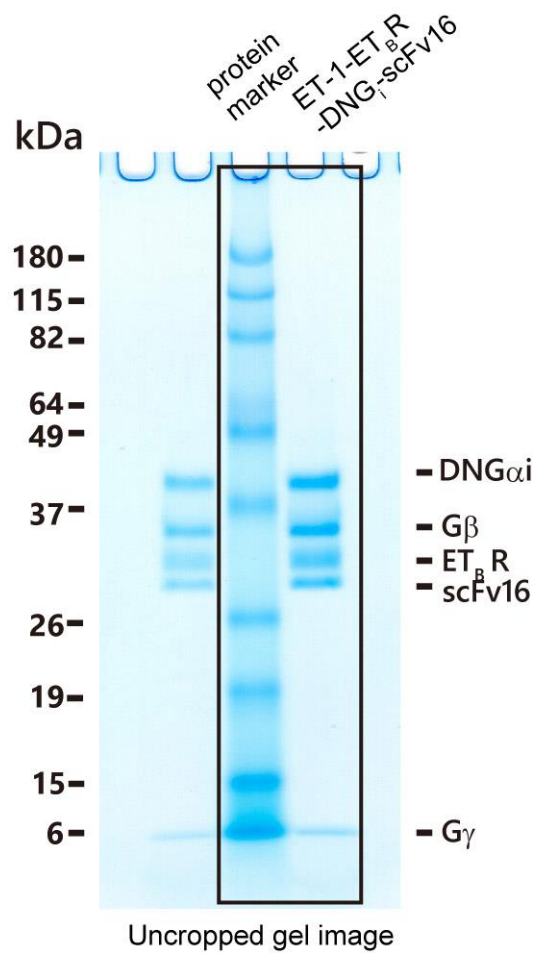

Supplement: 42003_2024_6905_MOESM2_ESM.pdf [file 42003_2024_6905_MOESM2_ESM.pdf]
