# Supplementary material for: Structure of endothelin ETB receptor–Gi complex in a conformation stabilized by unique NPxxL motif
Source: PubMed Central journal article supplement (PMC11484851; doi:10.1038/s42003-024-06905-z), 2024-10-16
Supplement: 42003_2024_6905_MOESM3_ESM.pdf [file 42003_2024_6905_MOESM3_ESM.pdf]

## Description of Additional Supplementary Files

**File name:** Supplementary Data

**Description:** The source data behind the graphs in the paper
